1           **Mapping the coupled human and natural disturbance**  
2                                   **regimes of Europe's forests**

3

4                                   Cornelius Senf<sup>1,2\*</sup> and Rupert Seidl<sup>1,2,3</sup>

5

6

7           <sup>1</sup> Institute for Silviculture, University of Natural Resources and Life Sciences (BOKU),

8                                   Vienna, Austria

9           <sup>2</sup> Ecosystem dynamics and forest management group, Technical University of Munich, Hans-

10                                  Carl-von-Carlowitz-Platz 2, 85354 Freising, Germany

11           <sup>3</sup> Berchtesgaden National Park, Doktorberg 6, 83471, Berchtesgaden, Germany

12

13

14                                  \*Corresponding author: [Cornelius.senf@tum.de](mailto:Cornelius.senf@tum.de)

15 **Abstract:** Forest disturbance shape ecosystem composition and structure, and changes in  
16 forest disturbances can have strong consequences for carbon storage and biodiversity. Yet we  
17 currently lack consistent quantitative data on Europe’s forest disturbance regimes and their  
18 changes over time. Here we used satellite data to map three decades (1986-2016) of forest  
19 disturbances across continental Europe, covering 35 countries and a forest area of 210 Mill.  
20 ha at a spatial grain of 30 m, and analyzed the patterns and trends in disturbance size,  
21 frequency and severity. Between 1986 and 2016, 17% of Europe’s forest area was disturbed  
22 by anthropogenic or natural causes, totaling to 25 Mill. individual disturbance patches with a  
23 mean patch size 1.09 ha (range between 1<sup>st</sup> and 99<sup>th</sup> percentile 0.18 – 10.10 ha). On average  
24 0.52 (0.02 – 3.01) disturbances occurred per km<sup>2</sup> every year, removing on average 77% (22 –  
25 100%) of the canopy. While spatial patterns of disturbance were highly variable, disturbance  
26 frequency consistently increased, and disturbance severity decreased since 1986. Both social  
27 and ecological factors are needed to explain the observed patterns and trends in forest  
28 disturbance. We thus conclude that in order to understand and manage the changes in  
29 Europe’s forest disturbance regimes a coupled human and natural systems perspective is  
30 needed.

31

32 **Keywords:** Coupled Human and Environmental System; Disturbance regime; Remote  
33 sensing; Forest management; Resilience

34

35 Forests cover 33 % of Europe's total land area and provide important services to society,  
36 ranging from carbon sequestration to the filtration of water, protection of soil from erosion,  
37 and human infrastructure from natural hazards <sup>1</sup>. Europe's forests have expanded in recent  
38 decades <sup>2</sup> and accumulated substantial amounts of biomass due to intensive post-war  
39 reforestation programs, changes in management systems, and timber harvesting rates that  
40 remained below increment <sup>3</sup>. This success story of 20<sup>th</sup> century forestry in Europe, however,  
41 also has side effects, as the resultant changes in forest structure have – in combination with  
42 climate change – led to an episode of increasing forest disturbances in recent decades <sup>4-7</sup>.  
43 Increasing forest disturbances have the potential to erode Europe's carbon storage potential <sup>8,9</sup>  
44 and also impact other important services provided by Europe's forests <sup>10,11</sup>. Given a predicted  
45 increase in the demand for wood <sup>1</sup> and an expected future intensification of forest dieback  
46 under climate change <sup>12</sup>, it is fundamental to increase the resilience of Europe's forests to  
47 changing disturbances <sup>13-15</sup>.

48         Developing resilient management strategies requires a robust quantitative  
49 understanding of forest ecosystem dynamics <sup>16</sup>. In particular, it is essential to understand the  
50 disturbance regimes of Europe's forests <sup>17</sup>. Disturbance regimes characterize the cumulative  
51 effects of all disturbance events occurring in a given area and time period, and understanding  
52 them is fundamental to understanding the current state and future trajectories of forest  
53 ecosystems <sup>18</sup>. In Europe, however, forests have been utilized by humans for centuries,  
54 transforming species composition and structure <sup>19-21</sup>, and consequently also the natural  
55 disturbance regimes of forests. In addition to this indirect effect, human land-use is directly  
56 disturbing forest canopies through timber harvesting, altering the rate and spatial patterns of  
57 forest disturbances compared to natural systems <sup>22</sup>. Human land-use also interacts with natural  
58 disturbances, e.g. by salvaging disturbed timber <sup>23</sup> and shortening early seral stages through  
59 planting <sup>24</sup>. More broadly, forest management alters biological legacies and landscape  
60 structure <sup>23,25</sup>, with feedbacks on subsequent disturbances. Due to the intricate linkages

61 between natural and human processes driving forest disturbances in Europe, analyzing them  
62 in the context of coupled human and natural systems<sup>26,27</sup> is a promising approach. Given that  
63 relevant drivers of future changes in forest disturbance regimes are social-ecological (e.g.,  
64 anthropogenic climate change, novel disturbances caused by the introduction of non-native  
65 disturbance agents, land-use change) applying such a perspective could considerably increase  
66 the inferential potential on current and future changes of forest dynamics cross Europe's  
67 forests.

68 Despite the widespread and long-lasting impacts of changing forest disturbances on  
69 forest ecosystems<sup>10</sup> little quantitatively information on disturbance regimes and their changes  
70 through time exist for Europe. We, for instance, do not know how disturbance size, frequency  
71 and severity (i.e., the main descriptors of disturbance regimes;<sup>28</sup>) are distributed throughout  
72 Europe. Furthermore, while recent studies indicate an increase in disturbance rates across  
73 Europe's natural and managed forests<sup>4,6</sup>, it remains unknown whether this change is mainly  
74 driven by changes in disturbance frequency (i.e., more disturbance events) or disturbance size  
75 (i.e., larger individual disturbance patches). Likewise, our quantitative knowledge on changes  
76 in disturbance severity is scant, and it remains unclear whether disturbances in Europe have  
77 become more severe in recent decades (e.g., through increased burn severities;<sup>29</sup>) or whether  
78 recent changes in forest policy (e.g., the adoption of "close-to-nature" silviculture;<sup>30</sup>) have  
79 reduced disturbance severity<sup>4</sup>.

80 Here, our aim was to map the patterns and trends of recent (1986-2016) forest  
81 disturbance regimes in Europe. Our specific research questions were: (I) What is the size,  
82 frequency and severity of forest disturbances across Europe's forests? And (II) How did size,  
83 frequency and severity of forest disturbances change over the past three decades? We address  
84 these first two questions by mapping forest disturbance occurrence and severity continuously  
85 for continental Europe (35 countries covering 210 Mill. ha of forest) at a spatial grain of  
86 30 m. We subsequently analyze the disturbance regimes of Europe's forests in a coupled

87 human and natural systems framework, asking (III) how strongly patterns and trends in  
88 disturbance size, frequency and severity are explained by variation in the natural template vs.  
89 variation in forest policy. We address this third question by comparing the patterns and trends  
90 in disturbance regime indicators among ecoregions (i.e., an aggregate proxy of the spatial  
91 differences in the drivers of natural forest development) and countries (as the spatial entities  
92 encapsulating the variation in forest policies in Europe <sup>31</sup>), hypothesizing that under a coupled  
93 human and natural system perspective both social and ecological factors are needed to explain  
94 patterns and trends in disturbance regimes across Europe's forests.

## 95 **Results**

96 We identified a total of 25 Mill. individual disturbance patches occurring across Europe  
97 between 1986-2016, equaling a disturbed forest area of 4 Mill. ha or 17 % of Europe's forests  
98 (Figure 1). The overall accuracy of our map was 92.5 %, with a disturbance commission error  
99 of 14.6 % and a disturbance omission error of 32.8 %, but we refer the reader to  
100 Supplementary Note 1 for further information on map accuracies. The average patch size of  
101 forest disturbances in Europe was 1.09 ha, but the disturbance size distribution was highly  
102 left-skewed (Figure 2 B). The median disturbance size was only 0.45 ha, with 78 % of the  
103 disturbances being smaller than 1 ha and 99 % of the disturbances being smaller than 10 ha  
104 (Supplement Table 2). The largest disturbance patch mapped across Europe was a 16,617 ha  
105 large forest fire occurring in 2012 in southern Spain. The average disturbance frequency was  
106 0.52 patches per km<sup>2</sup> per year (median of 0.37 patches per km<sup>2</sup>), with highest frequencies  
107 (highest 1 %) ranging from 3 to 31 patches per km<sup>2</sup> (Supplement Table 2). Disturbance  
108 severity, that is a measure between 0 and 100 indicating the loss of canopy during disturbance  
109 (see Figure 1C), ranged from 23 % to 100 %, with an average of 77 % of canopy loss within a  
110 disturbed patch (median of 83 %; Supplement Table 2).

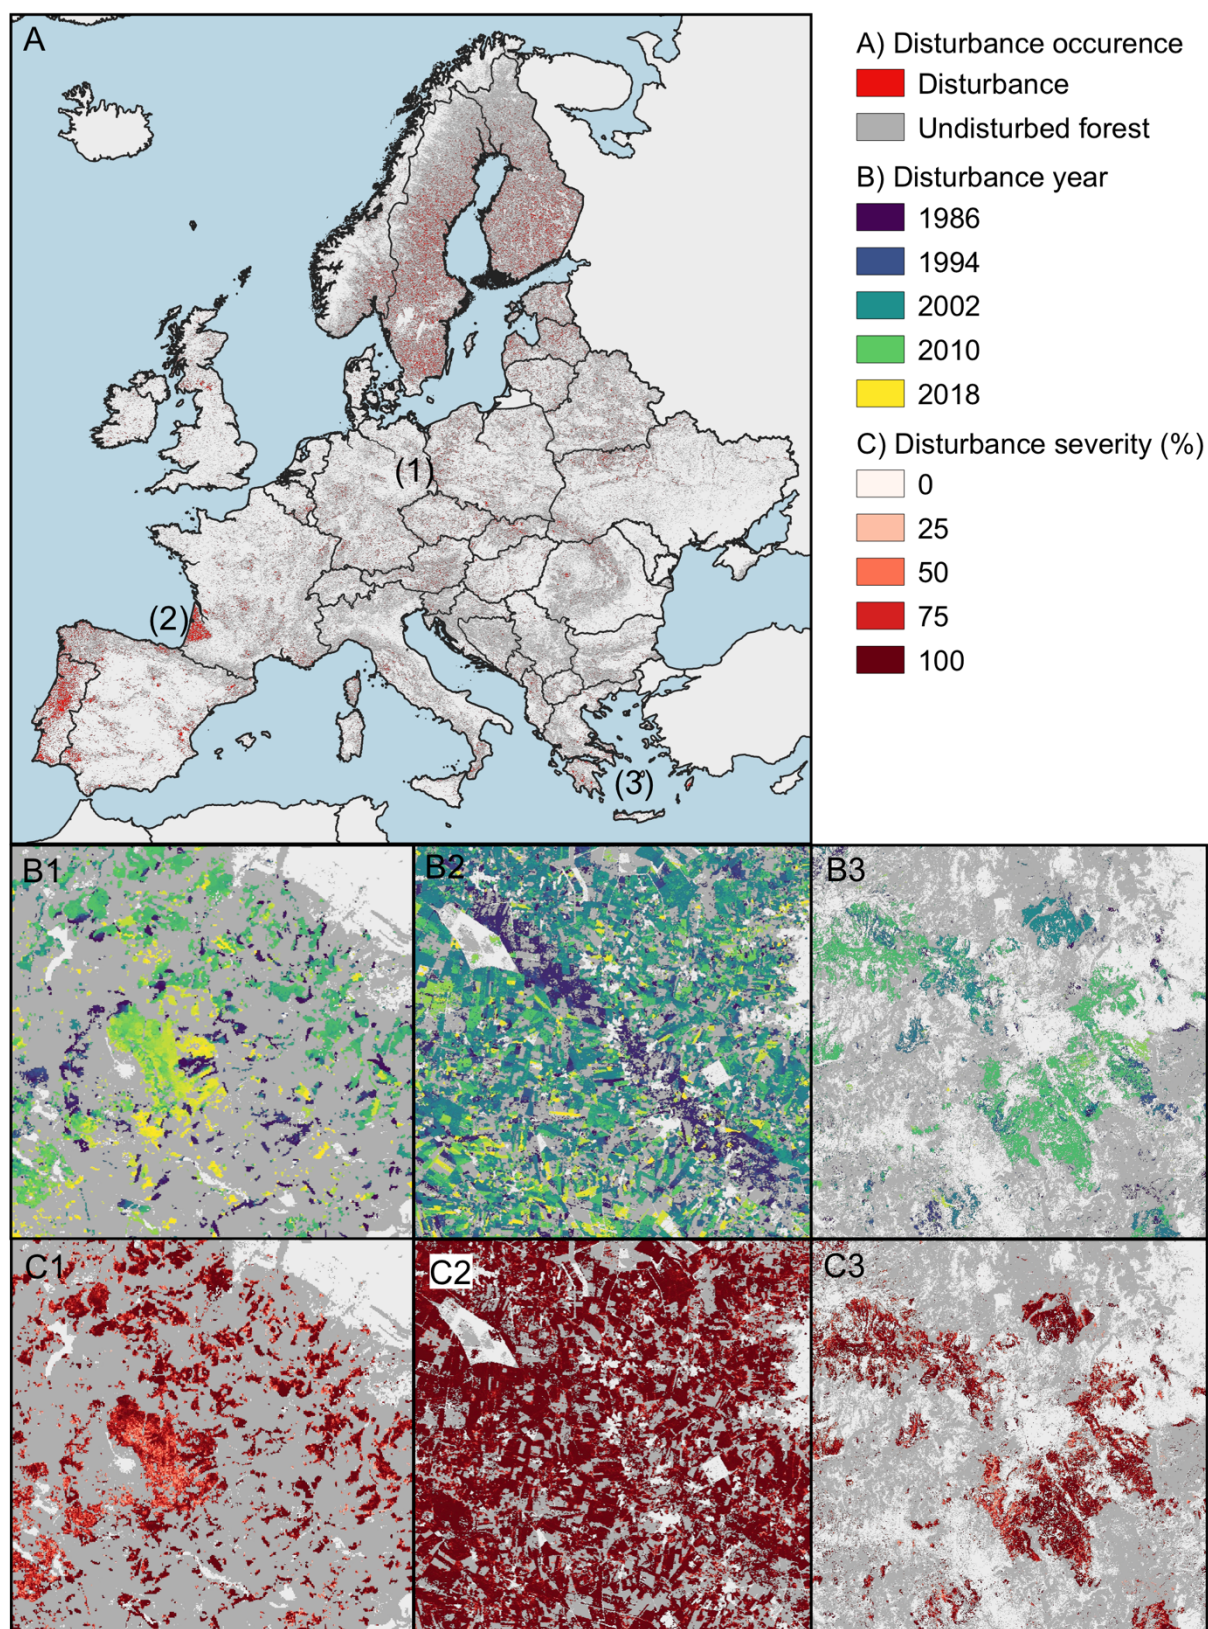

111

112 **Fig. 1:** Forest disturbances in Europe 1986-2016. Disturbance maps were derived from

113 manually interpreting more than 30,000 Landsat images systematically distributed across

114 Europe. Panel A shows the occurrence of disturbances across Europe. Panels B show the

115 disturbance year and panels C show the disturbance severity – a measure of canopy cover loss  
116 – for three selected areas: (1) Bark beetle outbreak of varying severity in and around Harz  
117 National Park (Germany); (2) wind disturbance in an intensively managed plantation forest in  
118 the Landes of Gascony (France) with very high disturbance severities; and (3) fire  
119 disturbances on the Peloponnese peninsula (Greece), with variable burn-severities.

120  
121 Spatial variability in the size, frequency and severity of forest disturbances is high  
122 across Europe (Figure 2 A). Disturbance patches are generally larger in Northern and  
123 Southern Europe compared to Central Europe. Also, Eastern Europe has larger disturbance  
124 patches compared to Western Europe (Figure 2 A). Above-average disturbance frequencies  
125 were found in Central Europe, the hemi-boreal zone, parts of France and the Iberian Peninsula  
126 (Figure 2 A). The highest disturbance frequencies (i.e., above 3 patches per km<sup>2</sup>) occurred  
127 almost exclusively in Portugal. Disturbance severity was more evenly distributed than the  
128 other two disturbance regime indicators (Figure 2 A), with a tendency towards higher  
129 severities in the Atlantic forests of Ireland and the United Kingdom, the Iberian Peninsula, the  
130 Po-Valley, and the Pannonian Basin. In contrast, low disturbance severities were recorded for  
131 South-Eastern Europe along the Dinaric mountain range, as well as in the Apennine  
132 mountains of Italy.

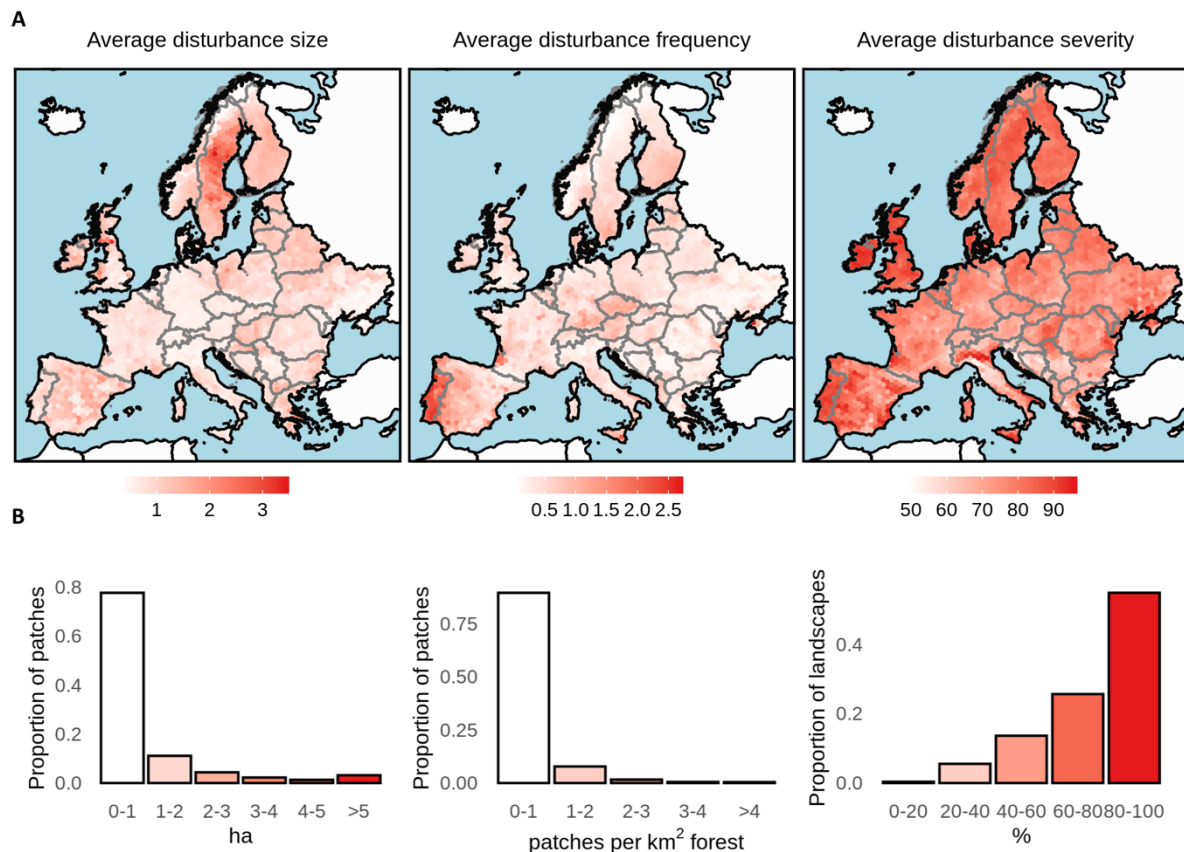

133

134 **Fig. 2:** (A) Maps of average disturbance size, frequency and severity calculated for hexagons  
135 on a 50 km grid across continental Europe. (B) Distribution of disturbance size, frequency  
136 and severity across Europe.

137

138 Disturbance regimes changed profoundly between 1986 and 2016, with 65 % of  
139 Europe's forests experiencing an increase in disturbance size, and 74 % an increase in  
140 disturbance frequency (Figure 3 B). Hot spots of increasing disturbance size were in the  
141 Baltic states, the United Kingdom, Ireland, and Italy (Figure 3 A), whereas trends were  
142 largely negative in Eastern Germany, western Poland and southeastern Europe (Figure 3 A).  
143 Hot spots of increasing disturbance frequency were located in Central and Eastern Europe  
144 (Figure 3), whereas negative trends in disturbance frequency were recorded for Belarus,  
145 western Europe, and northern Scandinavia (Figure 3 A). Disturbance severity decreased in



146 85 % of the European forest area (Figure 3), with particularly strong trends in Central and  
147 Southeastern Europe.

148 While the mean disturbance size generally increased across Europe (Figure 3) the  
149 median disturbance size was more stable (no change in median disturbance size in 81 % of  
150 European forests; Supplementary Table 3). Hence, changes in disturbance size were driven by  
151 a widening of the disturbance size distribution, with approximately 50 % of Europe's forests  
152 showing an increase in large disturbance patches (i.e., in the 75% quantile and maximum of  
153 the disturbance patch size distribution; Supplement Table 3). Overall, changes in disturbance  
154 frequency explained 71 % of the variability in changing disturbance rates (i.e., the trend in the  
155 annual percent of forest area disturbed), whereas changes in disturbance size only accounted  
156 for 24 % (see Supplementary Figure 8). Thus, changes in disturbance rates are primarily  
157 driven by changes in disturbance frequency, and not disturbance size, in Europe's forests.  
158

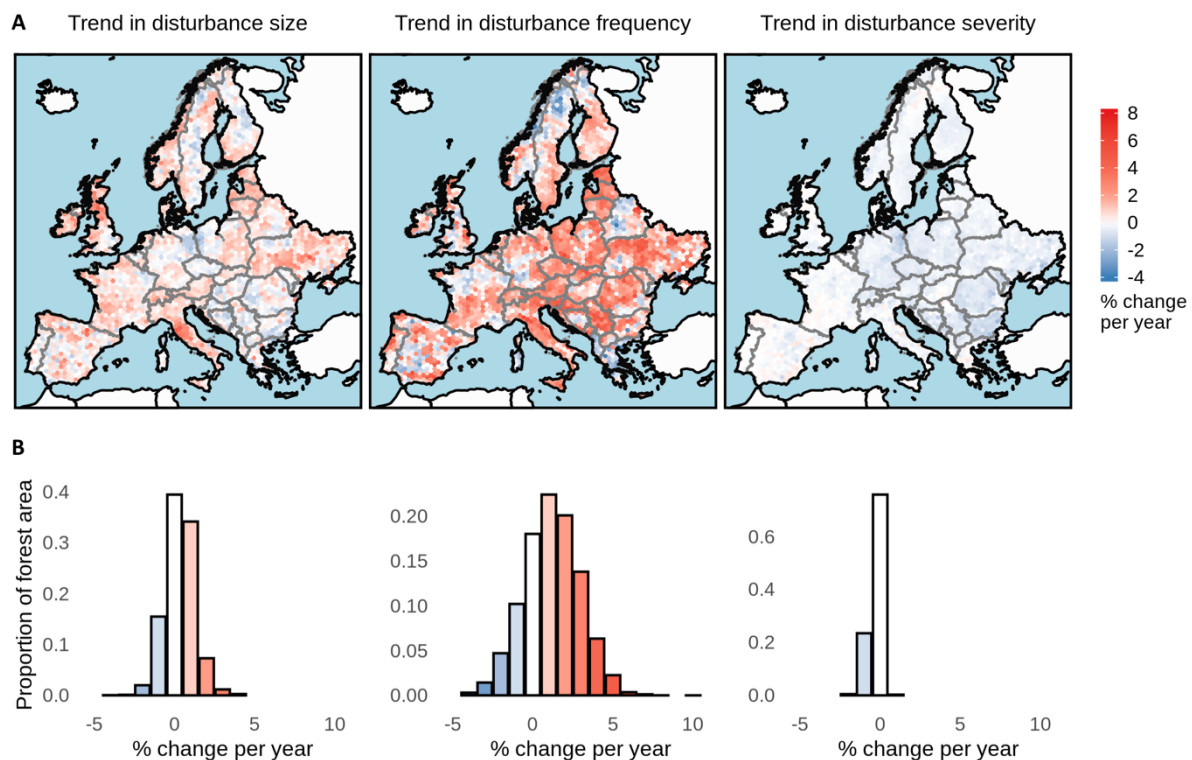

159

160 **Fig. 3:** (A) Maps of trends in disturbance size, frequency and severity calculated at a 50 km  
161 hexagon grid across continental Europe. (B) Distribution of forest area among trend classes.

162

163 Spatial variability in all three disturbance regime indicators varied significantly with  
 164 ecoregion (i.e., a coarse filter proxy of spatial differences in the drivers of natural forest  
 165 development), and ecoregions alone explained 15, 28 and 39 % of the continental-scale  
 166 spatial variation in disturbance size, frequency and severity, respectively (Table 1). Including  
 167 within-ecoregion variability by country (i.e., a coarse filter proxy for differences in forest  
 168 policy and management) further increased the variance explained by 16, 24 and 16 percentage  
 169 points, respectively (Table 1).

170

171 **Table 1:** Variance explained by ecoregions and countries nested within ecoregions derived  
 172 from linear mixed effect models testing for differences in averages and trends in disturbance  
 173 size, frequency and severity measured across 3,240 50 km<sup>2</sup> hexagons. Also shown is the  
 174 amount of variance explained by random variation among years (for averages), as well as the  
 175 residual variance (i.e., variance not explained by the two coarse filter variables used here).

| Indicator       | Variance explained |                      |      | Residual variance |
|-----------------|--------------------|----------------------|------|-------------------|
|                 | Ecoregions         | Ecoregions/countries | Year |                   |
| Average         |                    |                      |      |                   |
| Mean size (log) | 0.15               | 0.16                 | 0.01 | 0.67              |
| Frequency (log) | 0.28               | 0.24                 | 0.03 | 0.45              |
| Severity        | 0.39               | 0.16                 | 0.07 | 0.37              |
| Trend           |                    |                      |      |                   |
| Mean size       | 0.12               | 0.11                 | -    | 0.77              |
| Frequency       | 0.09               | 0.24                 | -    | 0.67              |
| Severity        | 0.19               | 0.14                 | -    | 0.68              |

176

177 Trends in size and severity were also determined by a combination of ecoregions and  
 178 policy differences within ecoregions, with the two factors explaining roughly equal parts of  
 179 the spatial variation in disturbances trends (Table 1). For changes in frequency ecoregion  
 180 alone was a poor predictor, whereas country explained 24 % of the variance in frequency  
 181 trends (Table 2). Hence, while the ecological template determines the general spatial pattern  
 182 of the disturbance regimes in Europe, human activity modulates this pattern considerably (for

183 estimates see Supplementary Figure S9, S10), underlining the coupled human and natural  
184 nature of forest disturbances in Europe.

## 185 **Discussion**

186 We here provide the first quantitative characterization of Europe's forest disturbance regimes,  
187 highlighting the wide variability in disturbance sizes, frequencies and severities prevailing  
188 across the European continent. We show that this variability is determined by the combined  
189 effects of natural processes (i.e., variation in climate and soil, resulting in different forest  
190 development trajectories) and human activity (i.e., variation in forest policy, resulting in  
191 different management regimes). Differences in forest policy can be large even among  
192 neighboring countries in Europe, especially among countries of variable socio-political  
193 histories (e.g., the iron curtain dividing the continent into two geopolitical spheres). These  
194 differences in forest policy result in different management intensities and silvicultural  
195 practices<sup>31</sup> and variable land use legacies<sup>21</sup>. For example, spatial patterns of timber  
196 extraction can vary widely between countries, resulting in contrasting disturbance sizes and  
197 frequencies within ecoregions (Supplementary Figure S11). Another example for the impact  
198 of forest policy on disturbance regimes is the varying share of plantation forests with non-  
199 native tree species<sup>1</sup>, such as *Eucalyptus* sp. in Portugal or Black locust (*Robinia*  
200 *pseudoacacia*) in Hungary (Supplementary Figure S12). Human activity thus has a profound  
201 impact on the forest disturbance regimes of Europe, on the one hand altering disturbance  
202 regimes directly via timber harvesting, and on the other hand indirectly modifying disturbance  
203 processes through changing species composition and forest structure. Our results hence  
204 support the hypothesis that the European forest disturbance regime is a coupled human and  
205 natural system, driven by the complex interplay between social and ecological forces.

206 The disturbance regimes of Europe's forests are changing profoundly. We here show  
207 that the previously reported increase in disturbance activity<sup>4,6,7</sup> is primarily an effect of

208 increasing disturbance frequency, while disturbance patch size distributions are becoming  
209 more variable and disturbance severities are decreasing. Variation in forest policy was a more  
210 important predictor of changing disturbance frequencies than the variation in the natural  
211 template, suggesting human resource use as a major driver of change<sup>1,4,7,32</sup>. In contrast, the  
212 widening of the patch size distribution likely results from the combined effects of  
213 management changes (towards smaller intervention sizes) and increased natural disturbance  
214 activity (resulting in large areas of canopy removal). The same developments also result in  
215 decreasing disturbance severity at the continental scale, with management systems being  
216 optimized to reduce impact<sup>33</sup> and natural disturbance events being frequently characterized  
217 by mixed severities<sup>34</sup>. We conclude that recent trends in Europe's forest disturbance regimes  
218 are strongly driven by the interaction of social and ecological forces, with human resource use  
219 feedbacking to the natural system and *vice versa* (Figure 4).

220

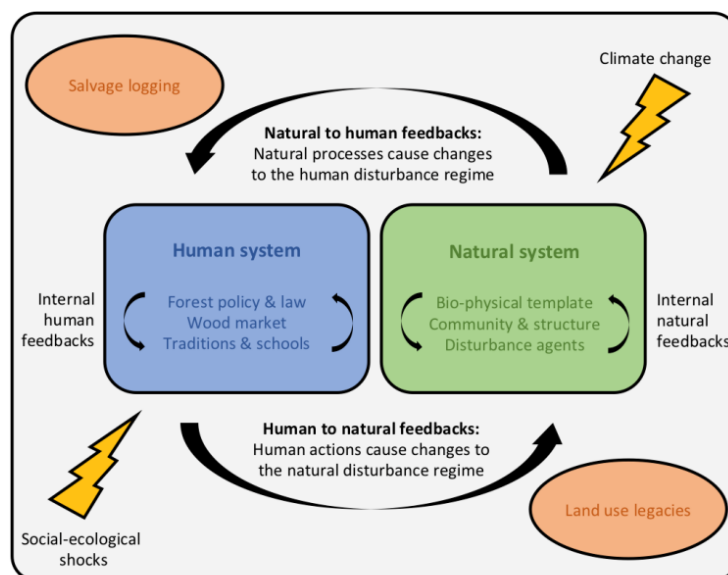

221

222 **Fig. 4:** Europe's disturbance regimes as coupled human and natural system.

223

224 Our results have important implications for the future of Europe's forests. First, by  
225 characterizing the recent disturbance regimes of Europe we provide a baseline to assess future

226 changes. This is important as disturbances are expected to change considerably in the coming  
227 decades <sup>22,35</sup>, yet a sound quantitative baseline for quantifying these changes has been missing  
228 to date. Second, we highlight that both socio-ecological shocks (such as reforestation waves  
229 after the Second World War <sup>3</sup> or the collapse of the Soviet Union <sup>36</sup>) and changes in the  
230 biophysical environment (such as climate change) drive changes in forest disturbance regimes  
231 (Figure 4). This has important consequences for managing the resultant negative  
232 consequences of increasing disturbances on ecosystem service provisioning <sup>10</sup>. In particular,  
233 our analyses suggest that efforts focusing on both the mitigation of climate change and the  
234 compensation of increasing canopy openings in forest policy and management are needed to  
235 bend the curve and stabilize forest canopy turnover at sustainable rates <sup>37</sup>. A further focus  
236 should be on steering the intricate social-ecological interactions driving disturbance regimes  
237 towards dampening feedbacks (Figure 4). For instance, management should focus on creating  
238 land use legacies that reduce the propensity of natural disturbances in the future <sup>28,38</sup>, which  
239 will reduce the need for management techniques that cause harm to important ecosystem  
240 services and biodiversity (i.e., salvage logging) <sup>25,39</sup>. Overall, we suggest that acknowledging  
241 complex social-ecological interactions is elementary for managing Europe's forests and key  
242 to creating resilient systems that will sustain important functions and services under an  
243 uncertain future.  
244

## 245 **Materials and Methods**

### 246 *Reference data*

247 Acquiring consistent reference data across large areas – such as continental Europe – is  
248 challenging and we therefore make use of manual interpretation of satellite data, serving as  
249 valuable alternative to field-based data<sup>40</sup>. Manual interpretation of satellite data for  
250 calibrating and validating Landsat-based forest change maps is a well-established approach  
251 and has been used in numerous studies previously<sup>41–44</sup>. In essence, an interpreter inspects the  
252 temporal profile of a Landsat pixel and, with the help of Landsat image chips and very high-  
253 resolution imagery available in Google Earth, makes a well-informed call whether the  
254 trajectory represents a stable forest or a forest experiencing a mortality event<sup>45</sup>. We here used  
255 a previously established set of 19,996 interpreted Landsat pixels<sup>4,7</sup>. The initial sample was  
256 drawn at random within forests of Europe, with samples stratified by country. Yet, as  
257 interpreters might declare a plot as no-forest during interpretation (caused by errors in the  
258 automatically generated forest mask), the realized sample size slightly varied (Table S1).  
259 Please note that samples for six Central European countries stem from another study using the  
260 same image interpretation approach but have higher sampling densities. The response design  
261 followed well-documented protocols developed and published previously<sup>4</sup>. Manual  
262 interpretation was done by a total of nine interpreters using established software tools<sup>45</sup>, and  
263 the data is freely accessible under following repository:

264 <https://doi.org/10.5281/zenodo.3561925>

265 The reference sample set only consisted of forest pixels and there was thus need for  
266 substituting the sample with non-forest reference pixels. We therefore drew a country-  
267 stratified sample of non-forest pixels using a Landsat-based land cover map from<sup>46</sup>. Each  
268 countries sample size was chosen to match the forest proportion of the respective country  
269 (based on data from the FAOSTATS database), that is the total sample of each country  
270 equaled a random sample across its terrestrial forested and non-forested land surface (see

271 Table S1). In total we drew 46,461 non-forest reference pixel that, paired with the 19,996  
272 forest reference pixels manually interpreted, totaled to 66,457 reference pixels used for  
273 calibration and validation. From the full reference sample, we randomly drew a sub-sample of  
274 5,000 pixels for map validation, and the remaining 61,457 pixels were used for model  
275 calibration. The validation sub-sample was drawn proportionally to the size of each country to  
276 ensure a consistent and unbiased estimation of map accuracies for the final European map  
277 product.

### 278 *Mapping disturbances*

279 At the core of our mapping workflow we rely on an established time-series segmentation  
280 approach called LandTrendr<sup>47</sup>, implemented in the high-performance cloud-computing  
281 environment Google Earth Engine<sup>48</sup>. In essence, LandTrendr segments annual Landsat pixel  
282 time series into linear features from which a set of metrics can be extracted. We here do not  
283 provide details on the underlying LandTrendr routines but focus on the salient details of our  
284 mapping workflow (please see Figure S2 for a graphical outline of our mapping workflow).  
285 The workflow was based on code published in Kennedy et al.<sup>48</sup>.

286 In a first step we screened all available Tier 1 Landsat 4, 5, 7 and 8 images in the  
287 United States Geological Survey archive. Tier 1 images are delivered as ready-to-use surface  
288 reflectance images including a cloud mask, yet we used coefficients from Roy et al.<sup>49</sup> to  
289 spectrally align the varying sensor types used onboard Landsat 4/5 (Thematic Mapper),  
290 Landsat 7 (Enhanced Thematic Mapper Plus), and Landsat 8 (Operational Land Imager).  
291 After spectral alignment we filtered all available images for summer-season acquisition dates  
292 (1<sup>st</sup> of June to 30<sup>th</sup> September) and built annual medoid composites following Flood<sup>50</sup>.

293 Second, we ran LandTrendr for two spectral bands (shortwave infrared I and II) and  
294 two spectral indices commonly used for forest disturbance and mortality mapping<sup>43,44,51–53</sup>:  
295 The Tasseled Cap wetness (TCW) and the Normalized Burn Ratio (NBR). We used a

296 standard parameter set for LandTrendr with no filtering or thresholding and thus allowing for  
297 maximum sensitivity in detecting changes (i.e., allowing for a high commission error).

298 Third, we extracted the greatest change segment from each pixel's LandTrendr fit to  
299 both spectral bands and both spectral indices. From the greatest change segment we derived a  
300 set of three metrics describing the magnitude, duration and rate of change<sup>51</sup>; as well as a  
301 measure of the signal-to-noise ratio described in Cohen et al.<sup>52</sup>. We further derived the  
302 spectral band/index value prior to, and the rate of change following the greatest change  
303 segment. Similar metrics as the ones used here have been applied also in many previous  
304 studies mapping forest cover changes<sup>42,44,53</sup>.

305 Fourth, we used the set of metrics derived from the greatest change segment for the  
306 two spectral bands and the two spectral indices, the calibration data outlined in the previous  
307 section, and random forest classification<sup>54</sup> to classify each pixel into either no-forest,  
308 undisturbed forest or disturbed forest (i.e., at least one disturbance event during the study  
309 period). This last step filtered out commission errors by LandTrendr and thus greatly  
310 improves mapping accuracy compared to purely automatic algorithms<sup>55</sup>. Yet, we experienced  
311 difficulties in correctly separating forest and no-forest areas solely based on LandTrendr  
312 outputs. This was due to high spectral changes in agricultural areas, which were identified as  
313 disturbances by LandTrendr. To tackle this problem, we added a three-year Tasseled Cap  
314 Brightness, Greenness and Wetness median composite centered on 1985 and 2018,  
315 respectively, to the classification stack. The additional six bands delivered more detailed  
316 spectral information on stable forest and no-forest pixels. Finally, we applied the trained  
317 random forest model to the full classification stack (i.e., LandTrendr metrics from the two  
318 spectral bands and two spectral indices plus the Tasseled Cap composite from 1985 and 2018)  
319 to consistently map the categories no forest, undisturbed forest and forest disturbances across  
320 continental Europe. We validated the final map using the validation sub-sample described in



321 the previous section. We derived a confusion matrix and report overall accuracy, errors of  
322 commission and errors of omission following best-practice recommendations given in <sup>40</sup>.

323 Fifth, while the thus derived map indicates that a mortality event has happened, they  
324 do not indicate when the mortality event happened. We therefore calculated the disturbance  
325 onset year (i.e., the year of the greatest spectral change) from all spectral bands and spectral  
326 indices using a majority vote. If there was a tie (e.g., all four bands/indices indicated a  
327 different year), we reverted to the median value. To validate this processing step, we  
328 compared the year assigned from LandTrendr to the manually interpreted year of disturbance  
329 for the 19,996 forest reference plots.

### 330 *Spatial filtering*

331 The last step in creating disturbance maps for continental Europe was to apply a set of spatial  
332 filters for smoothing the resulting disturbance maps and enhancing spatial pattern analysis.  
333 We first set a minimum mapping unit of two  $30 \times 30$  m pixels (i.e., 0.18 ha) and removed all  
334 patches smaller than the minimum mapping unit. In a second filtering step, we identified all  
335 annual patches smaller than the minimum mapping unit and assigned them to the year of the  
336 surrounding pixels, thus smoothing the definition of patches (see Figure S3). In a final  
337 filtering step, we removed holes within mortality patches smaller than the minimum mapping  
338 unit by filling them with the year of the surrounding pixels. While the spatial filtering was  
339 done to improve the spatial analysis described in the following section, we note that the  
340 filtering was applied after the accuracy assessment. The accuracy assessment thus reports the  
341 raw classification performance without additional filtering.

### 342 *Characterizing disturbance regimes and their changes*

343 From the annual forest disturbance maps we calculated three disturbance regime indicators  
344 based on Turner <sup>17</sup> and Johnstone et al. <sup>28</sup>: disturbance size, frequency and severity.  
345 Disturbance size and severity were first calculated at the patch level and then aggregated to  
346 the landscape level, while disturbance frequency was calculated at the landscape level

347 directly. Patch size is the number of disturbed pixels for each individual patch (patches were  
348 defined annually using a rook-contiguity) multiplied by pixel size (0.09 ha). For calculating  
349 disturbance frequency, we sub-divided the total study area into a 50 \* 50 km hexagon grid  
350 (here representing the landscape scale), totaling to 3,240 hexagons across Europe's land area.  
351 We chose hexagons over squares, as hexagons minimize the spatial difference to the more  
352 complex border of countries and ecoregions used in later analysis. For each hexagon, we then  
353 counted the number of individual patches per year and divided this number by the total forest  
354 area within the hexagon, yielding a measure of the number of patches per km<sup>2</sup> forest area per  
355 year as in indicator of disturbance frequency.

356         For quantifying disturbance severity, we made use of the spectral change magnitude  
357 provided by the LandTrendr analysis. The spectral change magnitude during disturbance is  
358 well correlated with changes in vegetation cover<sup>51,56-59</sup>. Consequently, we here use it as  
359 measure of canopy cover change within a disturbed patch. To combine the spectral change  
360 magnitude from all four spectral bands/indices into one index of canopy cover change we  
361 used logistic regression to predict the occurrence of stand-replacing disturbances from the  
362 four spectral change magnitudes. Data on stand replacing disturbances was generated from  
363 the reference sample by analyzing the manually interpreted land cover after a disturbance  
364 segment. If the land cover switched to non-treed following a disturbance segment (e.g., after  
365 clear-cut harvest or high intensity fire), the disturbance is assigned as stand-replacing. If the  
366 land cover remains treed following a disturbance segment (e.g., following a thinning  
367 operation or a low intensity windthrow), the disturbance is classified as non-stand-replacing.  
368 The method is based on Senf et al.<sup>4</sup> who showed that visual interpretation of post-disturbance  
369 land cover is an accurate measure for separating stand-replacing from non-stand-replacing  
370 disturbances. By predicting the occurrence of stand-replacing disturbances (i.e., complete  
371 removal of the canopy), we scale the spectral change magnitudes to a value between 0 and 1  
372 (or 0 % and 100%), where 1 (or 100 %) indicates complete canopy loss. We validated this

373 measure of disturbance severity by separating stand-replacing and non-stand-replacing  
374 disturbances solely based on disturbance severity, expecting a high discriminatory power in  
375 separating the different disturbance types.

376 For spatially visualizing disturbance size, frequency and severity, as well as for  
377 calculating and visualizing trends, we finally aggregated the patch-based metrics (i.e.,  
378 disturbance size and severity) to the landscape level (i.e., the hexagon) by calculating the  
379 arithmetic mean. We report the mean over the median as it is sensitive to changes in both the  
380 central tendency and the spread of the distribution, but we also report other statistics in the  
381 Supplement. Trends in disturbance size, frequency and severity were quantified using a non-  
382 parametric Theil–Sen estimator, which is a non-parametric measure of monotonic trends in  
383 time series insensitive to outliers <sup>60</sup>.

#### 384 *Statistical analysis of differences between ecoregions and countries*

385 We used linear mixed effect models (LMM) to test for differences in averages and trends in  
386 disturbance size, frequency and severity among ecoregions and countries nested within  
387 ecoregions. Both ecoregions and countries nested within ecoregions were modelled as random  
388 effects, assuming the individual averages and trends emerging from a common underlying  
389 distribution <sup>61</sup>. For the average modes we also considered years as random effect. From the  
390 fitted LMMs we calculated the variance partition coefficient, that is the amount of variance  
391 explained by ecoregions, countries within ecoregions, and the residual variance within  
392 countries nested within ecoregions (i.e., variance not explained).

393

394 **References**

- 395 1. Forest Europe. *State of Europe's forests 2015*. (2015).
- 396 2. Fuchs, R., Herold, M., Verburg, P. H., Clevers, J. G. P. W. & Eberle, J. Gross changes  
397 in reconstructions of historic land cover/use for Europe between 1900 and 2010. *Global*  
398 *Change Biology* **21**, 299–313 (2015).
- 399 3. Ciais, P. *et al.* Carbon accumulation in European forests. *Nature Geoscience* **1**, 425–  
400 429 (2008).
- 401 4. Senf, C. *et al.* Canopy mortality has doubled across Europe's temperate forests in the  
402 last three decades. *Nature Communications* **9**, 4978 (2018).
- 403 5. Seidl, R., Schelhaas, M.-J. & Lexer, M. J. Unraveling the drivers of intensifying forest  
404 disturbance regimes in Europe. *Global Change Biology* **17**, 2842–2852 (2011).
- 405 6. Senf, C. & Seidl, R. Natural disturbances are spatially diverse but temporally  
406 synchronized across temperate forest landscapes in Europe. *Global Change Biology* **24**,  
407 1201–1211 (2018).
- 408 7. Senf, C., Sebal, J. & Seidl, R. Increasing canopy mortality challenges the future of  
409 Europe's forests. (In revision).
- 410 8. Nabuurs, G.-J. *et al.* First signs of carbon sink saturation in European forest biomass.  
411 *Nature Climate Change* **3**, 792–796 (2013).
- 412 9. Seidl, R., Schelhaas, M. J., Rammer, W. & Verkerk, P. J. Increasing forest  
413 disturbances in Europe and their impact on carbon storage. *Nature Climate Change* **4**, 806–  
414 810 (2014).
- 415 10. Thom, D. & Seidl, R. Natural disturbance impacts on ecosystem services and  
416 biodiversity in temperate and boreal forests. *Biological Reviews* **91**, 760–81 (2016).
- 417 11. Lindner, M. *et al.* Climate change impacts, adaptive capacity, and vulnerability of  
418 European forest ecosystems. *Forest Ecology and Management* **259**, 698–709 (2010).
- 419 12. Allen, C. D. *et al.* A global overview of drought and heat-induced tree mortality

- 420 reveals emerging climate change risks for forests. *Forest Ecology and Management* **259**, 660–  
421 684 (2010).
- 422 13. Trumbore, S., Brando, P. & Hartmann, H. Forest health and global change. *Science*  
423 **349**, 814–8 (2015).
- 424 14. Millar, C. I., Stephenson, N. L. & Stephens, S. L. CLIMATE CHANGE AND  
425 FORESTS OF THE FUTURE: MANAGING IN THE FACE OF UNCERTAINTY.  
426 *Ecological Applications* **17**, 2145–2151 (2007).
- 427 15. Seidl, R. The Shape of Ecosystem Management to Come: Anticipating Risks and  
428 Fostering Resilience. *BioScience* **64**, 1159–1169 (2014).
- 429 16. Bengtsson, J., Nilsson, S. G., Franc, A. & Menozzi, P. Biodiversity, disturbances,  
430 ecosystem function and management of European forests. *Forest Ecology and Management*  
431 **132**, 39–50 (2000).
- 432 17. Turner, M. G. Disturbance and landscape dynamics in a changing world. *Ecology* **91**,  
433 2833–49 (2010).
- 434 18. Asner, G. P. Geography of forest disturbance. *Proceedings of the National Academy of*  
435 *Sciences of the United States of America* **110**, 3711–2 (2013).
- 436 19. Bebi, P. *et al.* Changes of forest cover and disturbance regimes in the mountain forests  
437 of the Alps. *Forest Ecology and Management* **388**, 43–56 (2017).
- 438 20. Kulakowski, D., Bebi, P. & Rixen, C. The interacting effects of land use change,  
439 climate change and suppression of natural disturbances on landscape forest structure in the  
440 Swiss Alps. *Oikos* **120**, 216–225 (2011).
- 441 21. Munteanu, C. *et al.* Legacies of 19th century land use shape contemporary forest  
442 cover. *Global Environmental Change-Human and Policy Dimensions* **34**, 83–94 (2015).
- 443 22. Sommerfeld, A. *et al.* Patterns and drivers of recent disturbances across the temperate  
444 forest biome. *Nature Communications* **9**, (2018).
- 445 23. Lindenmayer, D. B. *et al.* Salvage harvesting policies after natural disturbance.

- 446 *Science* **303**, 1303 (2004).
- 447 24. Senf, C., Müller & Seidl, R. Post-disturbance recovery of forest cover and tree height  
448 differ with management in Central Europe. *Landscape Ecology* (2019).
- 449 25. Thorn, S. *et al.* Impacts of salvage logging on biodiversity: A meta-analysis. *Journal*  
450 *of Applied Ecology* **55**, 279–289 (2018).
- 451 26. Jianguo Liu *et al.* Coupled Human and Natural Systems. *AMBIO: A Journal of the*  
452 *Human Environment* **36**, 639–649 (2007).
- 453 27. Liu, J. *et al.* Complexity of Coupled Human and Natural Systems. *Science* **317**, 1513–  
454 1516 (2007).
- 455 28. Johnstone, J. F. *et al.* Changing disturbance regimes, ecological memory, and forest  
456 resilience. *Frontiers in Ecology and the Environment* **14**, 369–378 (2016).
- 457 29. Stephens, S. L. *et al.* Temperate and boreal forest mega-fires: characteristics and  
458 challenges. *Frontiers in Ecology and the Environment* **12**, 115–122 (2014).
- 459 30. Brang, P. *et al.* Suitability of close-to-nature silviculture for adapting temperate  
460 European forests to climate change. *Forestry* **87**, 492–503 (2014).
- 461 31. Levers, C. *et al.* Drivers of forest harvesting intensity patterns in Europe. *Forest*  
462 *Ecology and Management* **315**, 160–172 (2014).
- 463 32. Curtis, P. G., Slay, C. M., Harris, N. L., Tyukavina, A. & Hansen, M. C. Classifying  
464 drivers of global forest loss. *Science* **361**, 1108–1111 (2018).
- 465 33. Mori, A. S. & Kitagawa, R. Retention forestry as a major paradigm for safeguarding  
466 forest biodiversity in productive landscapes: A global meta-analysis. *Biological Conservation*  
467 **175**, 65–73 (2014).
- 468 34. Meigs, G. W. *et al.* More ways than one: Mixed-severity disturbance regimes foster  
469 structural complexity via multiple developmental pathways. *Forest Ecology and Management*  
470 **406**, 410–426 (2017).
- 471 35. Dale, V. H. *et al.* Climate Change and Forest Disturbances. *BioScience* **51**, 723–734

- 472 (2001).
- 473 36. Kuemmerle, T. *et al.* Post-Soviet farmland abandonment, forest recovery, and carbon  
474 sequestration in western Ukraine. *Global Change Biology* **17**, 1335–1349 (2011).
- 475 37. Lindenmayer, D., Messier, C. & Sato, C. Avoiding ecosystem collapse in managed  
476 forest ecosystems. *Frontiers in Ecology and the Environment* **14**, 561–568 (2016).
- 477 38. Seidl, R., Donato, D. C., Raffa, K. F. & Turner, M. G. Spatial variability in tree  
478 regeneration after wildfire delays and dampens future bark beetle outbreaks. *Proc Natl Acad*  
479 *Sci U S A* **113**, 13075–13080 (2016).
- 480 39. Dobor, L. *et al.* Is salvage logging effectively dampening bark beetle outbreaks and  
481 preserving forest carbon stocks? *Journal of Applied Ecology* **n/a**,.
- 482 40. Olofsson, P. *et al.* Good practices for estimating area and assessing accuracy of land  
483 change. *Remote Sensing of Environment* **148**, 42–57 (2014).
- 484 41. Potapov, P. V. *et al.* Eastern Europe’s forest cover dynamics from 1985 to 2012  
485 quantified from the full Landsat archive. *Remote Sensing of Environment* **159**, 28–43 (2015).
- 486 42. Senf, C., Pflugmacher, D., Hostert, P. & Seidl, R. Using Landsat time series for  
487 characterizing forest disturbance dynamics in the coupled human and natural systems of  
488 Central Europe. *ISPRS J Photogramm Remote Sens* **130**, 453–463 (2017).
- 489 43. Kennedy, R. E. *et al.* Spatial and temporal patterns of forest disturbance and regrowth  
490 within the area of the Northwest Forest Plan. *Remote Sensing of Environment* **122**, 117–133  
491 (2012).
- 492 44. Hermosilla, T., Wulder, M. A., White, J. C., Coops, N. C. & Hobart, G. W. An  
493 integrated Landsat time series protocol for change detection and generation of annual gap-free  
494 surface reflectance composites. *Remote Sensing of Environment* **158**, 220–234 (2015).
- 495 45. Cohen, W. B., Yang, Z. & Kennedy, R. Detecting trends in forest disturbance and  
496 recovery using yearly Landsat time series: 2. TimeSync — Tools for calibration and  
497 validation. *Remote Sensing of Environment* **114**, 2911–2924 (2010).

- 498 46. Pflugmacher, D., Rabe, A., Peters, M. & Hostert, P. Mapping pan-European land  
499 cover using Landsat spectral-temporal metrics and the European LUCAS survey. *Remote*  
500 *Sensing of Environment* (2018).
- 501 47. Kennedy, R. E., Yang, Z. & Cohen, W. B. Detecting trends in forest disturbance and  
502 recovery using yearly Landsat time series: 1. LandTrendr — Temporal segmentation  
503 algorithms. *Remote Sensing of Environment* **114**, 2897–2910 (2010).
- 504 48. Kennedy, R. *et al.* Implementation of the LandTrendr Algorithm on Google Earth  
505 Engine. *Remote Sensing* **10**, (2018).
- 506 49. Roy, D. P. *et al.* Characterization of Landsat-7 to Landsat-8 reflective wavelength and  
507 normalized difference vegetation index continuity. *Remote Sensing of Environment* **185**, 57–  
508 70 (2016).
- 509 50. Flood, N. Seasonal Composite Landsat TM/ETM+ Images Using the Medoid (a Multi-  
510 Dimensional Median). *Remote Sensing* **5**, 6481–6500 (2013).
- 511 51. Pflugmacher, D., Cohen, W. B. & E. Kennedy, R. Using Landsat-derived disturbance  
512 history (1972–2010) to predict current forest structure. *Remote Sensing of Environment* **122**,  
513 146–165 (2012).
- 514 52. Cohen, W. B., Yang, Z., Healey, S. P., Kennedy, R. E. & Gorelick, N. A LandTrendr  
515 multispectral ensemble for forest disturbance detection. *Remote Sensing of Environment* **205**,  
516 131–140 (2018).
- 517 53. Senf, C., Pflugmacher, D., Wulder, M. A. & Hostert, P. Characterizing spectral–  
518 temporal patterns of defoliator and bark beetle disturbances using Landsat time series. *Remote*  
519 *Sensing of Environment* **170**, 166–177 (2015).
- 520 54. Breiman, L. Random Forests. *Machine Learning* **45**, 5–32 (2001).
- 521 55. Cohen, W. *et al.* How Similar Are Forest Disturbance Maps Derived from Different  
522 Landsat Time Series Algorithms? *Forests* **8**, 98 (2017).
- 523 56. Bright, B. C., Hudak, A. T., Kennedy, R. E. & Meddens, A. J. H. Landsat Time Series



- 524 and Lidar as Predictors of Live and Dead Basal Area Across Five Bark Beetle-Affected  
525 Forests. *IEEE Journal of Selected Topics in Applied Earth Observations and Remote Sensing*  
526 **7**, 3440–3452 (2014).
- 527 57. Zald, H. S. J. *et al.* Integrating Landsat pixel composites and change metrics with lidar  
528 plots to predictively map forest structure and aboveground biomass in Saskatchewan, Canada.  
529 *Remote Sensing of Environment* **176**, 188–201 (2016).
- 530 58. Meigs, G. W., Kennedy, R. E., Gray, A. N. & Gregory, M. J. Spatiotemporal  
531 dynamics of recent mountain pine beetle and western spruce budworm outbreaks across the  
532 Pacific Northwest Region, USA. *Forest Ecology and Management* **339**, 71–86 (2015).
- 533 59. Meddens, A. J. H. & Hicke, J. A. Spatial and temporal patterns of Landsat-based  
534 detection of tree mortality caused by a mountain pine beetle outbreak in Colorado, USA.  
535 *Forest Ecology and Management* **322**, 78–88 (2014).
- 536 60. Wilcox, R. R. *Fundamentals of modern statistical methods: Substantially improving*  
537 *power and accuracy*. (Springer, 2010).
- 538 61. Gelman, A. Multilevel (Hierarchical) Modeling: What It Can and Cannot Do.  
539 *Technometrics* **48**, 432–435 (2006).
- 540
- 541

542 **Acknowledgements**

543 C. Senf acknowledges funding from the Austrian Science Fund (FWF) Lise-Meitner Program  
544 (Nr. M2652). R. Seidl acknowledges funding from FWF START grant Y895-B25. We thank  
545 Justin Brasten (Oregon State University) for making the code of LandTrendr open source,  
546 which greatly helped in implementing this research.

547

548 **Author contribution**

549 CS and RS designed the research; CS performed all computations and analyses; CS wrote the  
550 manuscript with input from RS.

551

552 **Data availability**

553 All maps presented in this research paper will be made publicly available after peer-review.

554

555 **Code availability**

556 The code used for processing the Landsat data is available at <https://github.com/eMapR/LT->  
557 [GEE](#). The research code used for creating the maps will be made available after peer-review.
